# Supplementary material for: Long-range inputome of cortical neurons containing corticotropin-releasing hormone
Source: PubMed Central journal article supplement (PMC7376058; doi:10.1038/s41598-020-68115-x), 2020-07-22
Supplement: 41598_2020_68115_MOESM1_ESM.pdf [file 41598_2020_68115_MOESM1_ESM.pdf]

# **Long-range inputome of cortical neurons containing corticotropin-releasing hormone**

Peilin Zhao<sup>1</sup>, Mengting Zhao<sup>1</sup>, Huading Wang<sup>1</sup>, Tao Jiang<sup>2</sup>, Xueyan Jia<sup>2</sup>, Jiaojiao Tian<sup>1</sup>,  
Qingtao Sun<sup>1</sup>, Anan Li<sup>1, 2, 3</sup>, Hui Gong<sup>1, 2, 3\*</sup>, Xiangning Li<sup>1, 2\*</sup>

<sup>1</sup> Britton Chance Center for Biomedical Photonics, Wuhan National Laboratory for Optoelectronics, MoE Key Laboratory for Biomedical Photonics, School of Engineering Sciences, Huazhong University of Science and Technology, Wuhan 430074, China

<sup>2</sup> HUST-Suzhou Institute for Brainsmatics, JITRI Institute for Brainsmatics, Suzhou 215123, China

<sup>3</sup> CAS Center for Excellence in Brain Science and Intelligence Technology, Chinese Academy of Science, Shanghai 200031, China

## ***Correspondence***

Xiangning Li, [lixiangning@mail.hust.edu.cn](mailto:lixiangning@mail.hust.edu.cn)

Hui Gong, [huigong@mail.hust.edu.cn](mailto:huigong@mail.hust.edu.cn)

**Supplementary Figure S1 Overview of whole-brain input distribution**

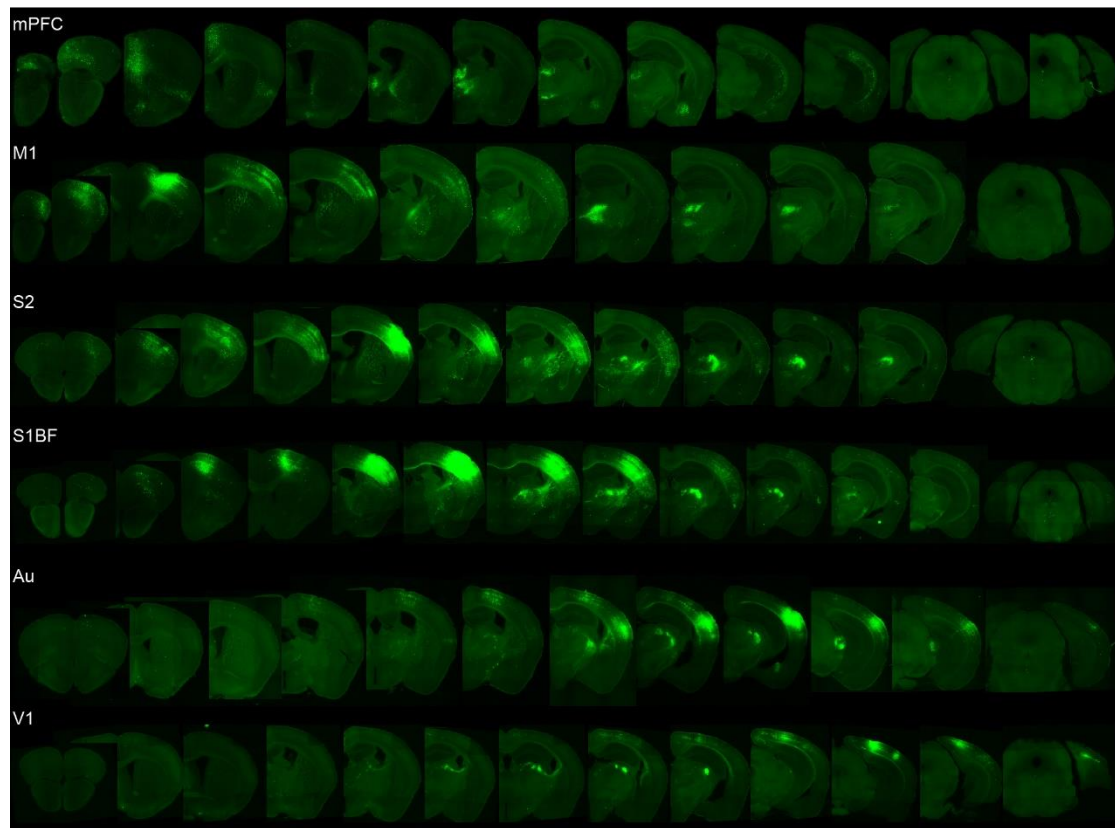

From top to bottom represents whole-brain input to mPFC, M1, S2, S1BF, Au and V1, respectively.

## Supplementary Figure S2 The location of start cells

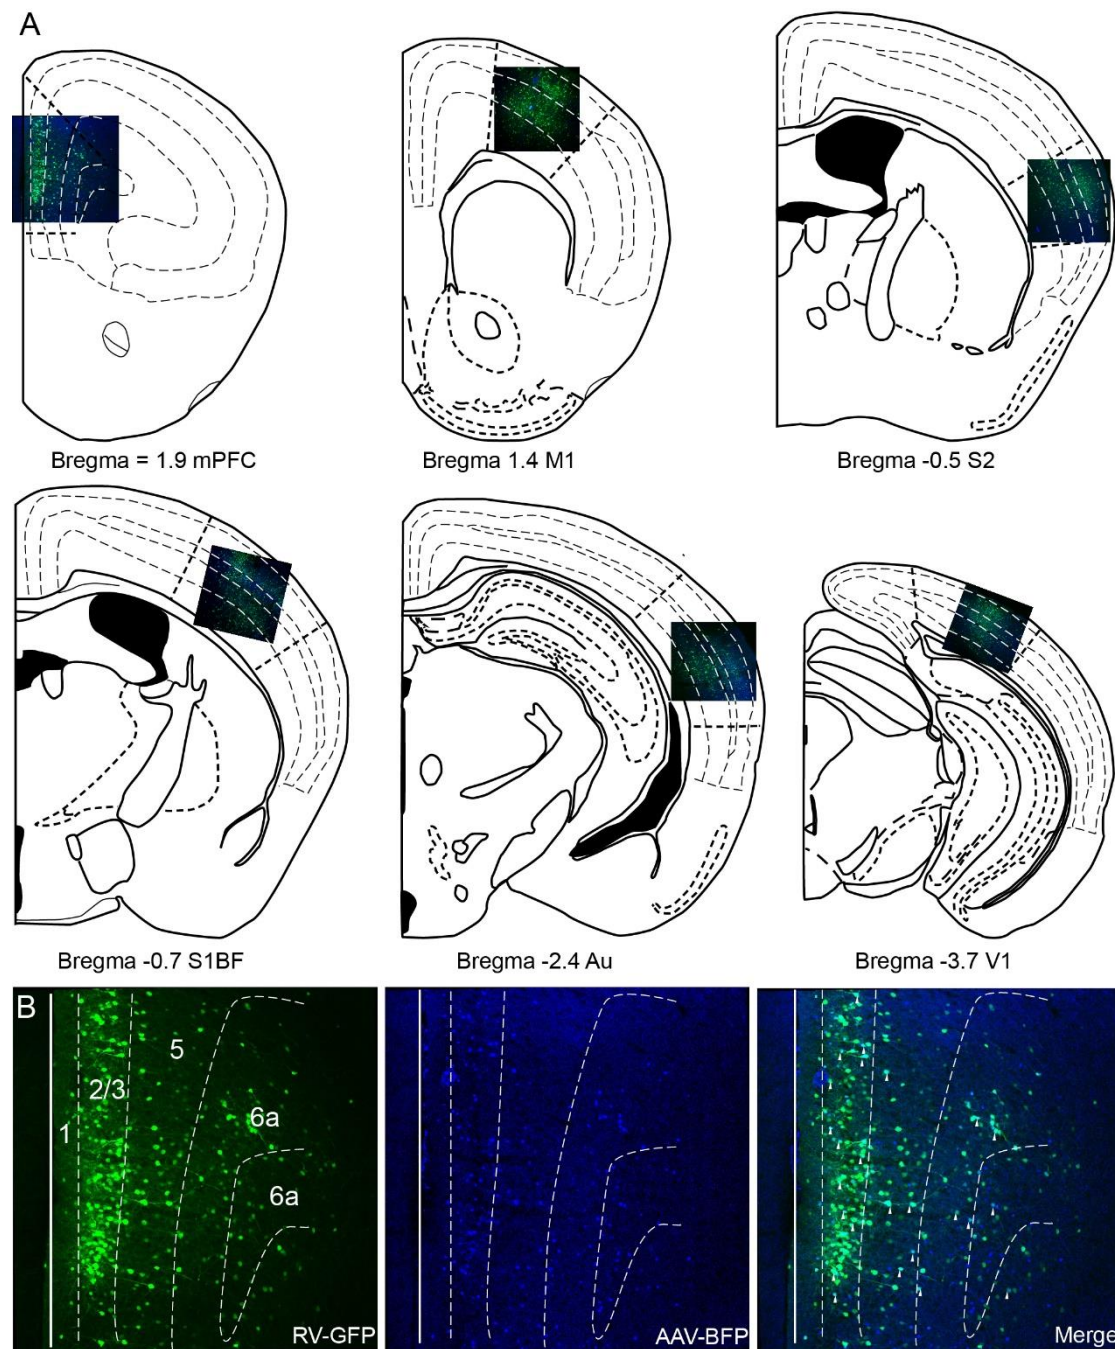

(A) The location of inject site in atlas. Start cells were confined to inject area. (B) A three-panel presentation with RV, BFP and merge, arrows point out start cells co-labeled with GFP and BFP.

Start cells distributed in different layers of mPFC except layer 1.

**Supplementary Figure S3 The specificity of virus used**

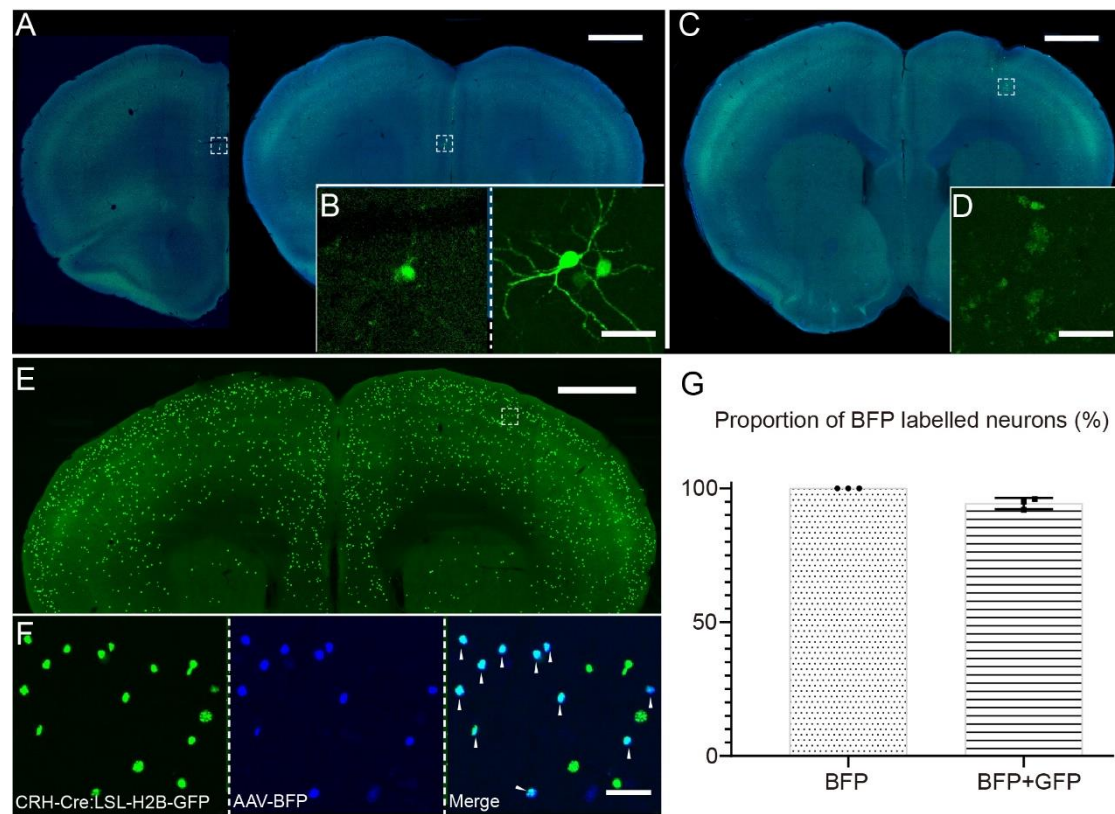

(A) AAV helpers were injected in mPFC of C57 mice and RV was performed in the same site three weeks later. (B) Clear view of the labelled neurons. (C) RV was performed in the M1 directly. Scale bar=1000 $\mu$ m. (D) An enlarged view of inject site, not any labeled neurons were found in M1. (E) AAV-DIO-TVA-BFP was performed in M1 of CRH-Cre:LSL-H2B-GFP mice. (F) A three-panel presentation with CRH neurons, BFP and merged. Arrows point out co-labelled neurons. (G) The proportion of neurons co-labelled with BFP and GFP. Data shown as mean  $\pm$  SEM; n = 3 mice. (A) (C) (E) Scale bar = 1000 $\mu$ m. (B) (D) (F) Scale bar = 50 $\mu$ m.



### Supplementary Figure S4 The distribution of thalamic input neurons

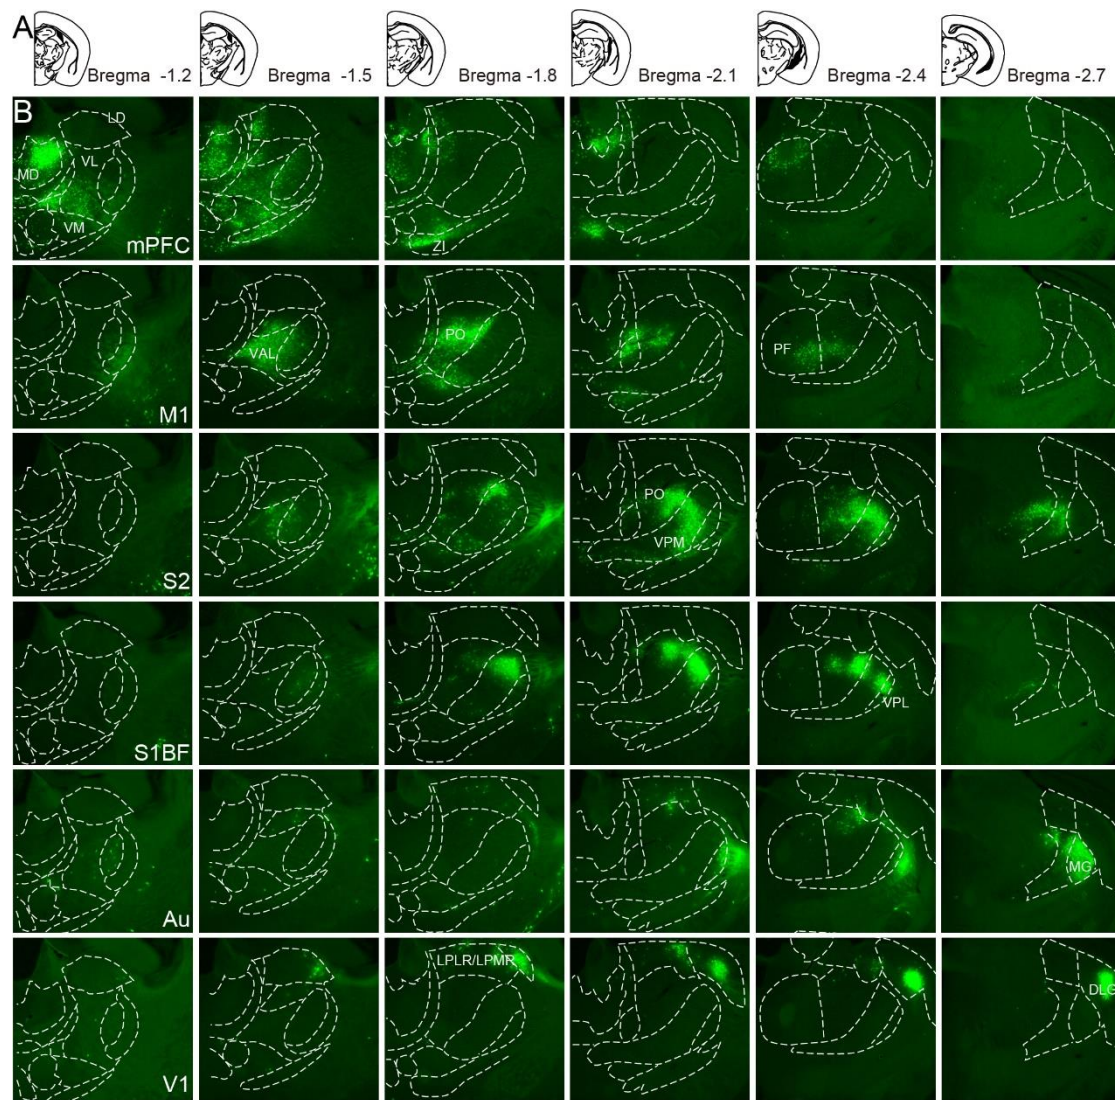

(A) The coronal plane in which different subregions of the thalamus are located. (B) The distribution of thalamic afferent neurons. From top to bottom represents thalamic input to mPFC, M1, S2, S1BF, Au and V1, respectively.

**Supplementary Figure S5 The cholinergic positive input neurons in the BF**

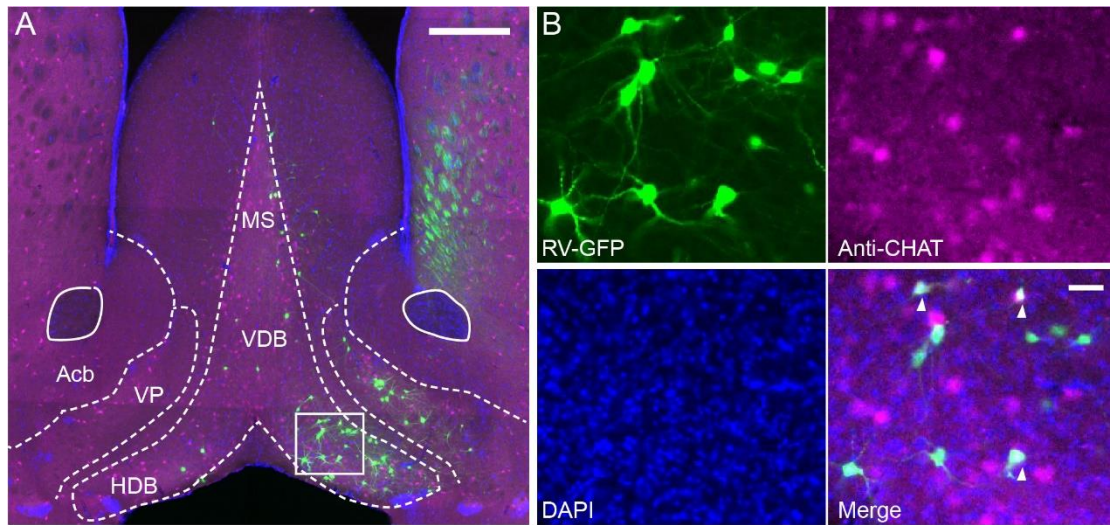

(A) Immunohistochemical staining of the BF neurons input to mPFC, Scale bar=500 $\mu$ m. (B) A four-panel presentation with RV, anti-CHAT, DAPI and merged, arrows point out cholinergic positive input neurons, scale bar = 50 $\mu$ m.

**Supplementary Table S1 The number of cells counted**

|             | <b>cortex</b> | <b>con-cortex</b> | <b>BF</b> | <b>amygdaloid</b> | <b>thalamus</b> | <b>hypothalamus</b> | <b>hippocampus</b> | <b>Middle brain</b> | <b>pons</b> | <b>total</b> |
|-------------|---------------|-------------------|-----------|-------------------|-----------------|---------------------|--------------------|---------------------|-------------|--------------|
| <b>mPFC</b> | 3418          | 1232              | 642       | 128               | 3110            | 374                 | 570                | 62                  | 10          | 9546         |
|             | 4371          | 2338              | 565       | 243               | 3397            | 601                 | 668                | 87                  | 27          | 12297        |
|             | 5776          | 2688              | 572       | 596               | 3703            | 568                 | 982                | 70                  | 33          | 14988        |
|             | 5376          | 2488              | 370       | 225               | 3923            | 314                 | 506                | 67                  | 27          | 13296        |
| <b>M1</b>   | 7696          | 671               | 131       | 2                 | 1264            | 11                  | 0                  | 3                   | 3           | 9781         |
|             | 5604          | 885               | 90        | 9                 | 1701            | 15                  | 0                  | 9                   | 0           | 8313         |
|             | 7119          | 1543              | 117       | 6                 | 1523            | 5                   | 0                  | 17                  | 2           | 10332        |
|             | 7720          | 1788              | 83        | 20                | 1034            | 0                   | 0                  | 4                   | 1           | 10650        |
| <b>S2</b>   | 5638          | 98                | 38        | 4                 | 840             | 2                   | 0                  | 0                   | 0           | 6620         |
|             | 7067          | 304               | 226       | 92                | 964             | 0                   | 0                  | 32                  | 0           | 8685         |
|             | 7508          | 508               | 328       | 8                 | 824             | 8                   | 0                  | 0                   | 0           | 9184         |
|             | 6634          | 807               | 117       | 39                | 1486            | 7                   | 0                  | 10                  | 9           | 9109         |
| <b>S1BF</b> | 7944          | 581               | 23        | 30                | 1757            | 10                  | 0                  | 13                  | 3           | 10361        |
|             | 7595          | 355               | 240       | 10                | 3325            | 25                  | 0                  | 5                   | 15          | 11570        |
|             | 4349          | 737               | 131       | 32                | 1618            | 1                   | 0                  | 4                   | 12          | 6884         |
|             | 5072          | 334               | 148       | 12                | 1532            | 8                   | 0                  | 2                   | 2           | 7110         |
|             | 5982          | 710               | 111       | 36                | 1784            | 18                  | 0                  | 13                  | 20          | 8674         |
|             | 5833          | 856               | 89        | 9                 | 1498            | 13                  | 0                  | 10                  | 5           | 8313         |
| <b>Au</b>   | 2916          | 346               | 101       | 2                 | 1417            | 13                  | 49                 | 1                   | 5           | 4850         |
|             | 4356          | 261               | 81        | 11                | 1860            | 12                  | 60                 | 2                   | 5           | 6648         |
|             | 3285          | 448               | 69        | 3                 | 1881            | 11                  | 74                 | 4                   | 6           | 5781         |
|             | 2328          | 393               | 147       | 6                 | 2493            | 15                  | 114                | 6                   | 6           | 5508         |
| <b>V1</b>   | 2554          | 47                | 40        | 0                 | 933             | 4                   | 28                 | 0                   | 0           | 3606         |
|             | 2829          | 399               | 18        | 0                 | 1581            | 6                   | 0                  | 0                   | 0           | 4833         |
|             | 2894          | 24                | 20        | 0                 | 1063            | 1                   | 26                 | 1                   | 1           | 4030         |
|             | 2360          | 16                | 37        | 0                 | 1025            | 2                   | 17                 | 3                   | 0           | 3460         |

**Supplementary Table S2 The abbreviation of brain regions**

| <b>Abbreviation</b> | <b>Full name</b>                                                                   |
|---------------------|------------------------------------------------------------------------------------|
| OFC                 | orbitofrontal cortex                                                               |
| mPFC                | medial prefrontal cortex                                                           |
| AON                 | anterior olfactory nucleus                                                         |
| AI                  | agranular insular cortex                                                           |
| M1                  | primary motor cortex                                                               |
| M2                  | secondary motor cortex                                                             |
| S2                  | secondary somatosensory cortex                                                     |
| S1Tr                | primary somatosensory cortex, trunk region                                         |
| S1FH                | primary somatosensory cortex, forelimb region                                      |
| S1ShNc              | primary somatosensory cortex, shoulder/neck region                                 |
| S1HL                | primary somatosensory cortex, hindlimb region                                      |
| S1BF                | primary somatosensory cortex, barrel field                                         |
| S1DZ                | primary somatosensory cortex, dysgranular region                                   |
| S1FL                | primary somatosensory cortex, forelimb region                                      |
| S1J-S1ULp           | primary somatosensory cortex, jaw region/upper lip region                          |
| Au                  | auditory cortex                                                                    |
| LPtA/MPtA           | lateral/medial parietal association cortex                                         |
| RSA/G               | retrosplenial agranular / granular cortex                                          |
| LEnt                | lateral entorhinal cortex                                                          |
| V1                  | primary visual cortex                                                              |
| V2                  | secondary visual cortex                                                            |
| vHIP                | ventral hippocampus                                                                |
| BLA                 | basolateral amygdaloid nucleus, anterior part                                      |
| BLP                 | basolateral amygdaloid nucleus, posterior part                                     |
| MS/VDB              | medial septal nucleus / nucleus of the vertical limb of the diagonal band          |
| HDB/MCPO            | nucleus of the horizontal limb of the diagonal band/magnocellular preoptic nucleus |
| LPO                 | lateral preoptic area                                                              |
| VP                  | ventral pallidum                                                                   |
| SI                  | substantia innominata                                                              |
| LGP                 | lateral globus pallidus                                                            |
| AM                  | anteromedial thalamic nucleus                                                      |
| VA                  | ventral anterior thalamic nucleus                                                  |



|       |                                                       |
|-------|-------------------------------------------------------|
| VL    | ventrolateral thalamic nucleus                        |
| VM    | ventromedial thalamic nucleus                         |
| VPM   | ventral posteromedial thalamic nucleus                |
| VPL   | ventral posterolateral thalamic nucleus               |
| CM    | central medial thalamic nucleus                       |
| CL    | centrolateral thalamic nucleus                        |
| Re/Rh | reuniens thalamic nucleus / rhomboid thalamic nucleus |
| MD    | mediodorsal thalamic nucleus                          |
| LD    | laterodorsal thalamic nucleus                         |
| LP    | lateral posterior thalamic nucleus                    |
| MG    | medial geniculate nucleus                             |
| DLG   | dorsal lateral geniculate nucleus                     |
| PO    | posterior thalamic nuclear group                      |
| PF    | parafascicular thalamic nucleus                       |
| ZI    | zona incerta                                          |
| VTA   | ventral tegmental area                                |
| MnR   | median raphe nucleus                                  |
| DR    | dorsal raphe nucleus                                  |

---

**Supplementary Table S3 Detail P values of significance analysis**

|                                 |      | mPFC      | M1       | S2       | S1BF      | Au       | V1       |
|---------------------------------|------|-----------|----------|----------|-----------|----------|----------|
| input<br>from<br>cortex         | mPFC | —         | P=0.0011 | P=0.0006 | p< 0.0001 | ns       | P=0.0054 |
|                                 | M1   | P=0.0011  | —        | ns       | ns        | ns       | ns       |
|                                 | S2   | P=0.0006  | ns       | —        | ns        | ns       | ns       |
|                                 | S1BF | p< 0.0001 | ns       | ns       | —         | ns       | ns       |
|                                 | Au   | ns        | ns       | ns       | ns        | —        | ns       |
|                                 | V1   | P=0.0054  | ns       | ns       | ns        | ns       | —        |
| input<br>from<br>con-<br>cortex | mPFC | —         | ns       | P=0.0092 | P=0.0097  | P=0.0097 | P=0.0082 |
|                                 | M1   | ns        | —        | ns       | ns        | ns       | ns       |
|                                 | S2   | P=0.0092  | ns       | —        | ns        | ns       | ns       |
|                                 | S1BF | P=0.0097  | ns       | ns       | —         | ns       | ns       |
|                                 | Au   | P=0.0097  | ns       | ns       | ns        | —        | ns       |
|                                 | V1   | P=0.0082  | ns       | ns       | ns        | ns       | —        |
| input<br>from<br>thalamus       | mPFC | —         | P=0.0352 | P=0.0057 | ns        | ns       | ns       |
|                                 | M1   | P=0.0352  | —        | ns       | ns        | ns       | P=0.0204 |
|                                 | S2   | P=0.0057  | ns       | —        | P=0.0323  | P=0.0429 | P=0.0024 |
|                                 | S1BF | ns        | ns       | P=0.0323 | —         | ns       | ns       |
|                                 | Au   | ns        | ns       | P=0.0429 | ns        | —        | ns       |
|                                 | V1   | ns        | P=0.0204 | P=0.0024 | ns        | ns       | —        |
